# Supplementary material for: Ring Trial on Quantitative Assessment of Bile Acids Reveals a Method- and Analyte-Specific Accuracy and Reproducibility
Source: MDPI journal article supplement (doi:10.3390/metabo12070583), 2022-06-23
Supplement: s1 [file s1]

## Supplemental material

Supplemental Table S1: Mean bile acid concentrations determined at each center

| Center   | Matrix      | Concentration level | Bile acid     | Mean concentration (nmol/L) | Standard deviation |
|----------|-------------|---------------------|---------------|-----------------------------|--------------------|
| Center_1 | MeOH:H2O    | Low concentration   | CA            | 1542.7                      | 200.3              |
| Center_1 | MeOH:H2O    | Low concentration   | CDCA          | 756.1                       | 94.0               |
| Center_1 | MeOH:H2O    | Low concentration   | GCA           | 328.6                       | 24.1               |
| Center_1 | MeOH:H2O    | Low concentration   | TCA           | 217.6                       | 10.7               |
| Center_1 | MeOH:H2O    | Low concentration   | DCA           | 340.9                       | 40.9               |
| Center_1 | MeOH:H2O    | Low concentration   | LCA           | 61.0                        | 6.1                |
| Center_1 | MeOH:H2O    | Low concentration   | $\alpha$ -MCA | 457.3                       | 68.8               |
| Center_1 | MeOH:H2O    | Low concentration   | $\beta$ -MCA  | 1161.2                      | 225.8              |
| Center_1 | MeOH:H2O    | Low concentration   | $\omega$ -MCA | 264.6                       | 46.7               |
| Center_1 | MeOH:H2O    | High concentration  | CA            | 10589.1                     | 1028.7             |
| Center_1 | MeOH:H2O    | High concentration  | CDCA          | 6825.4                      | 429.3              |
| Center_1 | MeOH:H2O    | High concentration  | GCA           | 36723.3                     | 3468.6             |
| Center_1 | MeOH:H2O    | High concentration  | TCA           | 20048.3                     | 1905.8             |
| Center_1 | MeOH:H2O    | High concentration  | DCA           | 2932.2                      | 215.9              |
| Center_1 | MeOH:H2O    | High concentration  | LCA           | 603.1                       | 37.7               |
| Center_1 | MeOH:H2O    | High concentration  | $\alpha$ -MCA | 4178.8                      | 575.4              |
| Center_1 | MeOH:H2O    | High concentration  | $\beta$ -MCA  | 10256.4                     | 1309.5             |
| Center_1 | MeOH:H2O    | High concentration  | $\omega$ -MCA | 2468.2                      | 335.1              |
| Center_1 | Human serum | Low concentration   | CA            | 1533.5                      | 157.1              |
| Center_1 | Human serum | Low concentration   | CDCA          | 427.5                       | 60.5               |
| Center_1 | Human serum | Low concentration   | GCA           | 152.8                       | 17.5               |
| Center_1 | Human serum | Low concentration   | TCA           | 213.5                       | 31.4               |
| Center_1 | Human serum | Low concentration   | DCA           | 186.7                       | 23.6               |
| Center_1 | Human serum | Low concentration   | LCA           | 43.6                        | 3.5                |
| Center_1 | Human serum | Low concentration   | $\alpha$ -MCA | 516.5                       | 78.5               |
| Center_1 | Human serum | Low concentration   | $\beta$ -MCA  | 1357.9                      | 207.3              |
| Center_1 | Human serum | Low concentration   | $\omega$ -MCA | 314.0                       | 58.8               |
| Center_1 | Human serum | High concentration  | CA            | 12526.1                     | 1834.8             |
| Center_1 | Human serum | High concentration  | CDCA          | 5215.9                      | 554.3              |
| Center_1 | Human serum | High concentration  | GCA           | 20167.5                     | 2328.9             |
| Center_1 | Human serum | High concentration  | TCA           | 10539.8                     | 1311.5             |
| Center_1 | Human serum | High concentration  | DCA           | 1989.1                      | 169.8              |
| Center_1 | Human serum | High concentration  | LCA           | 629.2                       | 58.5               |
| Center_1 | Human serum | High concentration  | $\alpha$ -MCA | 4378.3                      | 729.4              |
| Center_1 | Human serum | High concentration  | $\beta$ -MCA  | 11224.4                     | 2076.3             |
| Center_1 | Human serum | High concentration  | $\omega$ -MCA | 2914.7                      | 507.7              |

|          |             |                    |               |         |         |
|----------|-------------|--------------------|---------------|---------|---------|
| Center_1 | Mouse serum | Low concentration  | CA            | 1363.1  | 357.5   |
| Center_1 | Mouse serum | Low concentration  | CDCA          | 693.4   | 86.8    |
| Center_1 | Mouse serum | Low concentration  | GCA           | 465.9   | 55.3    |
| Center_1 | Mouse serum | Low concentration  | TCA           | 189.4   | 542.3   |
| Center_1 | Mouse serum | Low concentration  | DCA           | 292.5   | 38.7    |
| Center_1 | Mouse serum | Low concentration  | LCA           | 49.8    | 5.7     |
| Center_1 | Mouse serum | Low concentration  | $\alpha$ -MCA | 545.7   | 266.5   |
| Center_1 | Mouse serum | Low concentration  | $\beta$ -MCA  | 972.0   | 510.2   |
| Center_1 | Mouse serum | Low concentration  | $\omega$ -MCA | 239.1   | 105.6   |
| Center_1 | Mouse serum | High concentration | CA            | 10374.5 | 1831.5  |
| Center_1 | Mouse serum | High concentration | CDCA          | 6437.7  | 396.8   |
| Center_1 | Mouse serum | High concentration | GCA           | 53212.3 | 10623.3 |
| Center_1 | Mouse serum | High concentration | TCA           | 26911.0 | 4348.4  |
| Center_1 | Mouse serum | High concentration | DCA           | 2787.4  | 218.6   |
| Center_1 | Mouse serum | High concentration | LCA           | 566.1   | 95.1    |
| Center_1 | Mouse serum | High concentration | $\alpha$ -MCA | 3914.7  | 669.5   |
| Center_1 | Mouse serum | High concentration | $\beta$ -MCA  | 9564.6  | 1963.9  |
| Center_1 | Mouse serum | High concentration | $\omega$ -MCA | 2510.5  | 506.4   |
| Center_2 | MeOH:H2O    | Low concentration  | CA            | 1686.2  | 614.6   |
| Center_2 | MeOH:H2O    | Low concentration  | CDCA          | 1077.7  | 425.6   |
| Center_2 | MeOH:H2O    | Low concentration  | GCA           | 298.1   | 153.4   |
| Center_2 | MeOH:H2O    | Low concentration  | TCA           | 142.3   | 66.1    |
| Center_2 | MeOH:H2O    | Low concentration  | DCA           | 305.2   | 114.7   |
| Center_2 | MeOH:H2O    | Low concentration  | LCA           | 51.4    | 18.0    |
| Center_2 | MeOH:H2O    | Low concentration  | $\alpha$ -MCA | 0.0     | 0.0     |
| Center_2 | MeOH:H2O    | Low concentration  | $\beta$ -MCA  | 162.1   | 63.7    |
| Center_2 | MeOH:H2O    | Low concentration  | $\omega$ -MCA | 0.0     | 0.0     |
| Center_2 | MeOH:H2O    | High concentration | CA            | 23342.7 | 2294.7  |
| Center_2 | MeOH:H2O    | High concentration | CDCA          | 17631.4 | 1847.3  |
| Center_2 | MeOH:H2O    | High concentration | GCA           | 35781.7 | 3446.5  |
| Center_2 | MeOH:H2O    | High concentration | TCA           | 22680.4 | 2439.7  |
| Center_2 | MeOH:H2O    | High concentration | DCA           | 4161.9  | 393.5   |
| Center_2 | MeOH:H2O    | High concentration | LCA           | 794.3   | 68.7    |
| Center_2 | MeOH:H2O    | High concentration | $\alpha$ -MCA | 671.3   | 73.6    |
| Center_2 | MeOH:H2O    | High concentration | $\beta$ -MCA  | 2310.9  | 268.9   |
| Center_2 | MeOH:H2O    | High concentration | $\omega$ -MCA | 700.0   | 83.9    |
| Center_2 | Human serum | Low concentration  | CA            | 2880.1  | 118.6   |
| Center_2 | Human serum | Low concentration  | CDCA          | 2727.1  | 121.6   |
| Center_2 | Human serum | Low concentration  | GCA           | 454.2   | 28.2    |
| Center_2 | Human serum | Low concentration  | TCA           | 177.1   | 23.4    |
| Center_2 | Human serum | Low concentration  | DCA           | 515.5   | 43.0    |
| Center_2 | Human serum | Low concentration  | LCA           | 46.4    | 3.5     |

|          |             |                    |               |         |        |
|----------|-------------|--------------------|---------------|---------|--------|
| Center_2 | Human serum | Low concentration  | $\alpha$ -MCA | 29.8    | 4.7    |
| Center_2 | Human serum | Low concentration  | $\beta$ -MCA  | 264.7   | 18.5   |
| Center_2 | Human serum | Low concentration  | $\omega$ -MCA | 29.3    | 4.4    |
| Center_2 | Human serum | High concentration | CA            | 14153.6 | 720.3  |
| Center_2 | Human serum | High concentration | CDCA          | 10737.0 | 433.5  |
| Center_2 | Human serum | High concentration | GCA           | 21388.2 | 1195.9 |
| Center_2 | Human serum | High concentration | TCA           | 12577.3 | 2002.0 |
| Center_2 | Human serum | High concentration | DCA           | 2368.9  | 101.6  |
| Center_2 | Human serum | High concentration | LCA           | 510.2   | 22.6   |
| Center_2 | Human serum | High concentration | $\alpha$ -MCA | 402.1   | 16.7   |
| Center_2 | Human serum | High concentration | $\beta$ -MCA  | 1482.8  | 52.5   |
| Center_2 | Human serum | High concentration | $\omega$ -MCA | 411.3   | 75.7   |
| Center_2 | Mouse serum | Low concentration  | CA            | 3024.0  | 397.4  |
| Center_2 | Mouse serum | Low concentration  | CDCA          | 2101.8  | 222.5  |
| Center_2 | Mouse serum | Low concentration  | GCA           | 535.9   | 123.2  |
| Center_2 | Mouse serum | Low concentration  | TCA           | 269.9   | 106.4  |
| Center_2 | Mouse serum | Low concentration  | DCA           | 549.5   | 72.1   |
| Center_2 | Mouse serum | Low concentration  | LCA           | 84.7    | 13.2   |
| Center_2 | Mouse serum | Low concentration  | $\alpha$ -MCA | 90.6    | 18.1   |
| Center_2 | Mouse serum | Low concentration  | $\beta$ -MCA  | 331.2   | 118.0  |
| Center_2 | Mouse serum | Low concentration  | $\omega$ -MCA | 87.6    | 30.3   |
| Center_2 | Mouse serum | High concentration | CA            | 30914.7 | 2542.1 |
| Center_2 | Mouse serum | High concentration | CDCA          | 23992.8 | 1818.0 |
| Center_2 | Mouse serum | High concentration | GCA           | 46946.5 | 3690.8 |
| Center_2 | Mouse serum | High concentration | TCA           | 27030.0 | 2291.2 |
| Center_2 | Mouse serum | High concentration | DCA           | 5604.8  | 480.6  |
| Center_2 | Mouse serum | High concentration | LCA           | 1084.1  | 94.7   |
| Center_2 | Mouse serum | High concentration | $\alpha$ -MCA | 947.4   | 77.0   |
| Center_2 | Mouse serum | High concentration | $\beta$ -MCA  | 3203.9  | 251.7  |
| Center_2 | Mouse serum | High concentration | $\omega$ -MCA | 944.7   | 98.2   |
| Center_3 | MeOH:H2O    | Low concentration  | CA            | 2383.4  | 157.0  |
| Center_3 | MeOH:H2O    | Low concentration  | CDCA          | 974.8   | 119.0  |
| Center_3 | MeOH:H2O    | Low concentration  | GCA           | 404.7   | 74.4   |
| Center_3 | MeOH:H2O    | Low concentration  | TCA           | 234.2   | 35.3   |
| Center_3 | MeOH:H2O    | Low concentration  | DCA           | 479.8   | 75.6   |
| Center_3 | MeOH:H2O    | Low concentration  | $\alpha$ -MCA | 160.5   | 0.0    |
| Center_3 | MeOH:H2O    | Low concentration  | $\beta$ -MCA  | 410.8   | 82.3   |
| Center_3 | MeOH:H2O    | High concentration | CA            | 21865.1 | 1655.0 |
| Center_3 | MeOH:H2O    | High concentration | CDCA          | 9584.4  | 725.5  |
| Center_3 | MeOH:H2O    | High concentration | GCA           | 34093.5 | 2155.7 |
| Center_3 | MeOH:H2O    | High concentration | TCA           | 21283.0 | 1391.1 |
| Center_3 | MeOH:H2O    | High concentration | DCA           | 4386.7  | 582.0  |

|          |             |                    |               |         |        |
|----------|-------------|--------------------|---------------|---------|--------|
| Center_3 | MeOH:H2O    | High concentration | $\alpha$ -MCA | 1036.6  | 153.2  |
| Center_3 | MeOH:H2O    | High concentration | $\beta$ -MCA  | 2898.0  | 196.8  |
| Center_3 | Human serum | Low concentration  | CA            | 2113.7  | 202.3  |
| Center_3 | Human serum | Low concentration  | CDCA          | 902.0   | 203.0  |
| Center_3 | Human serum | Low concentration  | GCA           | 342.5   | 52.2   |
| Center_3 | Human serum | Low concentration  | TCA           | 249.4   | 41.6   |
| Center_3 | Human serum | Low concentration  | DCA           | 410.5   | 128.5  |
| Center_3 | Human serum | Low concentration  | $\alpha$ -MCA | 150.6   | 0.0    |
| Center_3 | Human serum | Low concentration  | $\beta$ -MCA  | 368.4   | 64.7   |
| Center_3 | Human serum | High concentration | CA            | 22658.4 | 1945.3 |
| Center_3 | Human serum | High concentration | CDCA          | 9901.0  | 1004.2 |
| Center_3 | Human serum | High concentration | GCA           | 33136.5 | 4229.1 |
| Center_3 | Human serum | High concentration | TCA           | 21250.1 | 1652.0 |
| Center_3 | Human serum | High concentration | DCA           | 4451.5  | 435.2  |
| Center_3 | Human serum | High concentration | $\alpha$ -MCA | 986.1   | 84.8   |
| Center_3 | Human serum | High concentration | $\beta$ -MCA  | 3003.2  | 523.8  |
| Center_3 | Mouse serum | Low concentration  | CA            | 2231.7  | 322.1  |
| Center_3 | Mouse serum | Low concentration  | CDCA          | 818.4   | 110.2  |
| Center_3 | Mouse serum | Low concentration  | GCA           | 382.0   | 73.6   |
| Center_3 | Mouse serum | Low concentration  | TCA           | 257.6   | 231.1  |
| Center_3 | Mouse serum | Low concentration  | DCA           | 482.3   | 84.0   |
| Center_3 | Mouse serum | Low concentration  | $\alpha$ -MCA | 184.0   | 30.7   |
| Center_3 | Mouse serum | Low concentration  | $\beta$ -MCA  | 233.6   | 87.4   |
| Center_3 | Mouse serum | High concentration | CA            | 21489.6 | 3507.4 |
| Center_3 | Mouse serum | High concentration | CDCA          | 8684.3  | 1110.1 |
| Center_3 | Mouse serum | High concentration | GCA           | 34520.8 | 4024.7 |
| Center_3 | Mouse serum | High concentration | TCA           | 18297.1 | 2064.6 |
| Center_3 | Mouse serum | High concentration | DCA           | 3956.0  | 361.7  |
| Center_3 | Mouse serum | High concentration | $\alpha$ -MCA | 1079.1  | 144.8  |
| Center_3 | Mouse serum | High concentration | $\beta$ -MCA  | 2496.2  | 455.7  |
| Center_4 | MeOH:H2O    | Low concentration  | CA            | 2125.2  | 145.2  |
| Center_4 | MeOH:H2O    | Low concentration  | CDCA          | 1002.3  | 93.1   |
| Center_4 | MeOH:H2O    | Low concentration  | GCA           | 324.0   | 27.4   |
| Center_4 | MeOH:H2O    | Low concentration  | TCA           | 211.9   | 20.6   |
| Center_4 | MeOH:H2O    | Low concentration  | DCA           | 315.0   | 54.4   |
| Center_4 | MeOH:H2O    | Low concentration  | LCA           | 79.1    | 10.3   |
| Center_4 | MeOH:H2O    | Low concentration  | $\beta$ -MCA  | 3.0     | 0.7    |
| Center_4 | MeOH:H2O    | High concentration | CA            | 19877.1 | 2871.2 |
| Center_4 | MeOH:H2O    | High concentration | CDCA          | 7832.0  | 4389.9 |
| Center_4 | MeOH:H2O    | High concentration | GCA           | 28865.2 | 4657.4 |
| Center_4 | MeOH:H2O    | High concentration | TCA           | 18725.9 | 3021.9 |
| Center_4 | MeOH:H2O    | High concentration | DCA           | 2627.6  | 1596.4 |

|          |             |                    |               |         |        |
|----------|-------------|--------------------|---------------|---------|--------|
| Center_4 | MeOH:H2O    | High concentration | LCA           | 881.6   | 86.9   |
| Center_4 | MeOH:H2O    | High concentration | $\beta$ -MCA  | 24.7    | 15.0   |
| Center_4 | Human serum | Low concentration  | CA            | 2286.8  | 60.3   |
| Center_4 | Human serum | Low concentration  | CDCA          | 840.7   | 379.6  |
| Center_4 | Human serum | Low concentration  | GCA           | 353.7   | 20.7   |
| Center_4 | Human serum | Low concentration  | TCA           | 235.8   | 6.5    |
| Center_4 | Human serum | Low concentration  | DCA           | 53.8    | 255.8  |
| Center_4 | Human serum | Low concentration  | LCA           | 77.3    | 6.9    |
| Center_4 | Human serum | Low concentration  | $\beta$ -MCA  | 3.4     | 1.4    |
| Center_4 | Human serum | High concentration | CA            | 22701.3 | 447.6  |
| Center_4 | Human serum | High concentration | CDCA          | 8548.3  | 1330.2 |
| Center_4 | Human serum | High concentration | GCA           | 34475.3 | 1767.4 |
| Center_4 | Human serum | High concentration | TCA           | 21495.3 | 1025.9 |
| Center_4 | Human serum | High concentration | DCA           | 2644.2  | 640.4  |
| Center_4 | Human serum | High concentration | LCA           | 1117.5  | 99.1   |
| Center_4 | Human serum | High concentration | $\beta$ -MCA  | 33.8    | 5.5    |
| Center_4 | Mouse serum | Low concentration  | CA            | 2183.9  | 189.8  |
| Center_4 | Mouse serum | Low concentration  | CDCA          | 763.8   | 284.2  |
| Center_4 | Mouse serum | Low concentration  | GCA           | 360.8   | 22.5   |
| Center_4 | Mouse serum | Low concentration  | TCA           | 36.9    | 41.3   |
| Center_4 | Mouse serum | Low concentration  | DCA           | 344.1   | 236.8  |
| Center_4 | Mouse serum | Low concentration  | LCA           | 88.1    | 18.2   |
| Center_4 | Mouse serum | Low concentration  | $\beta$ -MCA  | 607.5   | 1099.2 |
| Center_4 | Mouse serum | High concentration | CA            | 22554.8 | 1083.1 |
| Center_4 | Mouse serum | High concentration | CDCA          | 6187.9  | 2437.5 |
| Center_4 | Mouse serum | High concentration | GCA           | 32374.4 | 1571.0 |
| Center_4 | Mouse serum | High concentration | TCA           | 20150.9 | 1307.0 |
| Center_4 | Mouse serum | High concentration | DCA           | 2417.3  | 1146.7 |
| Center_4 | Mouse serum | High concentration | LCA           | 1010.9  | 128.8  |
| Center_4 | Mouse serum | High concentration | $\beta$ -MCA  | -1036.3 | 48.8   |
| Center_5 | MeOH:H2O    | Low concentration  | CA            | 2979.6  | 164.1  |
| Center_5 | MeOH:H2O    | Low concentration  | CDCA          | 1042.8  | 20.0   |
| Center_5 | MeOH:H2O    | Low concentration  | GCA           | 346.2   | 7.4    |
| Center_5 | MeOH:H2O    | Low concentration  | TCA           | 266.7   | 5.4    |
| Center_5 | MeOH:H2O    | Low concentration  | DCA           | 311.5   | 7.4    |
| Center_5 | MeOH:H2O    | Low concentration  | LCA           | 33.3    | 1.8    |
| Center_5 | MeOH:H2O    | Low concentration  | $\alpha$ -MCA | 120.8   | 5.5    |
| Center_5 | MeOH:H2O    | Low concentration  | $\beta$ -MCA  | 231.9   | 10.1   |
| Center_5 | MeOH:H2O    | Low concentration  | $\omega$ -MCA | 107.4   | 4.4    |
| Center_5 | MeOH:H2O    | High concentration | CA            | 16509.2 | 506.4  |
| Center_5 | MeOH:H2O    | High concentration | CDCA          | 10530.4 | 347.3  |
| Center_5 | MeOH:H2O    | High concentration | GCA           | 26586.1 | 354.3  |

|          |             |                    |               |         |       |
|----------|-------------|--------------------|---------------|---------|-------|
| Center_5 | MeOH:H2O    | High concentration | TCA           | 22150.8 | 503.8 |
| Center_5 | MeOH:H2O    | High concentration | DCA           | 3223.1  | 294.0 |
| Center_5 | MeOH:H2O    | High concentration | LCA           | 417.5   | 16.4  |
| Center_5 | MeOH:H2O    | High concentration | $\alpha$ -MCA | 1121.8  | 32.9  |
| Center_5 | MeOH:H2O    | High concentration | $\beta$ -MCA  | 1997.7  | 65.1  |
| Center_5 | MeOH:H2O    | High concentration | $\omega$ -MCA | 1024.8  | 35.3  |
| Center_5 | Human serum | Low concentration  | CA            | 2584.8  | 61.5  |
| Center_5 | Human serum | Low concentration  | CDCA          | 988.7   | 12.7  |
| Center_5 | Human serum | Low concentration  | GCA           | 300.4   | 4.7   |
| Center_5 | Human serum | Low concentration  | TCA           | 235.3   | 4.4   |
| Center_5 | Human serum | Low concentration  | DCA           | 315.9   | 15.6  |
| Center_5 | Human serum | Low concentration  | LCA           | 34.1    | 1.5   |
| Center_5 | Human serum | Low concentration  | $\alpha$ -MCA | 108.7   | 1.6   |
| Center_5 | Human serum | Low concentration  | $\beta$ -MCA  | 203.7   | 2.2   |
| Center_5 | Human serum | Low concentration  | $\omega$ -MCA | 96.9    | 1.5   |
| Center_5 | Human serum | High concentration | CA            | 15718.3 | 445.5 |
| Center_5 | Human serum | High concentration | CDCA          | 11100.9 | 318.5 |
| Center_5 | Human serum | High concentration | GCA           | 25772.7 | 428.5 |
| Center_5 | Human serum | High concentration | TCA           | 22743.7 | 724.1 |
| Center_5 | Human serum | High concentration | DCA           | 4127.6  | 280.6 |
| Center_5 | Human serum | High concentration | LCA           | 456.3   | 23.7  |
| Center_5 | Human serum | High concentration | $\alpha$ -MCA | 1130.1  | 19.3  |
| Center_5 | Human serum | High concentration | $\beta$ -MCA  | 1998.6  | 38.7  |
| Center_5 | Human serum | High concentration | $\omega$ -MCA | 1038.4  | 24.9  |
| Center_5 | Mouse serum | Low concentration  | CA            | 2935.6  | 217.6 |
| Center_5 | Mouse serum | Low concentration  | CDCA          | 1016.0  | 27.1  |
| Center_5 | Mouse serum | Low concentration  | GCA           | 309.9   | 6.3   |
| Center_5 | Mouse serum | Low concentration  | TCA           | 107.8   | 39.1  |
| Center_5 | Mouse serum | Low concentration  | DCA           | 312.2   | 9.3   |
| Center_5 | Mouse serum | Low concentration  | LCA           | 34.3    | 1.4   |
| Center_5 | Mouse serum | Low concentration  | $\alpha$ -MCA | 108.8   | 6.3   |
| Center_5 | Mouse serum | Low concentration  | $\beta$ -MCA  | 200.9   | 24.5  |
| Center_5 | Mouse serum | Low concentration  | $\omega$ -MCA | 75.0    | 8.3   |
| Center_5 | Mouse serum | High concentration | CA            | 15982.8 | 404.7 |
| Center_5 | Mouse serum | High concentration | CDCA          | 10430.5 | 330.5 |
| Center_5 | Mouse serum | High concentration | GCA           | 25167.1 | 456.3 |
| Center_5 | Mouse serum | High concentration | TCA           | 20516.0 | 804.4 |
| Center_5 | Mouse serum | High concentration | DCA           | 3680.8  | 339.3 |
| Center_5 | Mouse serum | High concentration | LCA           | 405.2   | 9.7   |
| Center_5 | Mouse serum | High concentration | $\alpha$ -MCA | 1045.2  | 26.5  |
| Center_5 | Mouse serum | High concentration | $\beta$ -MCA  | 1871.2  | 45.1  |
| Center_5 | Mouse serum | High concentration | $\omega$ -MCA | 952.6   | 25.6  |

|          |             |                    |               |         |        |
|----------|-------------|--------------------|---------------|---------|--------|
| Center_6 | MeOH:H2O    | Low concentration  | CA            | 2746.7  | 110.9  |
| Center_6 | MeOH:H2O    | Low concentration  | CDCA          | 1458.3  | 103.8  |
| Center_6 | MeOH:H2O    | Low concentration  | GCA           | 432.2   | 21.8   |
| Center_6 | MeOH:H2O    | Low concentration  | TCA           | 225.3   | 15.3   |
| Center_6 | MeOH:H2O    | Low concentration  | DCA           | 533.2   | 103.6  |
| Center_6 | MeOH:H2O    | Low concentration  | LCA           | 91.0    | 39.8   |
| Center_6 | MeOH:H2O    | Low concentration  | $\alpha$ -MCA | 142.0   | 10.1   |
| Center_6 | MeOH:H2O    | Low concentration  | $\beta$ -MCA  | 492.7   | 18.7   |
| Center_6 | MeOH:H2O    | Low concentration  | $\omega$ -MCA | 120.5   | 10.7   |
| Center_6 | MeOH:H2O    | High concentration | CA            | 25766.7 | 1714.3 |
| Center_6 | MeOH:H2O    | High concentration | CDCA          | 14400.0 | 853.2  |
| Center_6 | MeOH:H2O    | High concentration | GCA           | 37566.7 | 3072.2 |
| Center_6 | MeOH:H2O    | High concentration | TCA           | 20300.0 | 1473.8 |
| Center_6 | MeOH:H2O    | High concentration | DCA           | 5020.0  | 521.3  |
| Center_6 | MeOH:H2O    | High concentration | LCA           | 961.5   | 97.6   |
| Center_6 | MeOH:H2O    | High concentration | $\alpha$ -MCA | 1186.7  | 96.7   |
| Center_6 | MeOH:H2O    | High concentration | $\beta$ -MCA  | 3750.0  | 225.9  |
| Center_6 | MeOH:H2O    | High concentration | $\omega$ -MCA | 1041.5  | 55.3   |
| Center_6 | Human serum | Low concentration  | CA            | 2747.0  | 159.2  |
| Center_6 | Human serum | Low concentration  | CDCA          | 1193.5  | 214.4  |
| Center_6 | Human serum | Low concentration  | GCA           | 435.9   | 33.2   |
| Center_6 | Human serum | Low concentration  | TCA           | 231.1   | 19.0   |
| Center_6 | Human serum | Low concentration  | DCA           | 612.8   | 201.0  |
| Center_6 | Human serum | Low concentration  | LCA           | 65.0    | 26.2   |
| Center_6 | Human serum | Low concentration  | $\alpha$ -MCA | 135.8   | 14.6   |
| Center_6 | Human serum | Low concentration  | $\beta$ -MCA  | 471.2   | 24.6   |
| Center_6 | Human serum | Low concentration  | $\omega$ -MCA | 117.0   | 6.5    |
| Center_6 | Human serum | High concentration | CA            | 27615.3 | 1506.5 |
| Center_6 | Human serum | High concentration | CDCA          | 14216.8 | 1090.7 |
| Center_6 | Human serum | High concentration | GCA           | 49339.4 | 7324.7 |
| Center_6 | Human serum | High concentration | TCA           | 24840.8 | 3653.7 |
| Center_6 | Human serum | High concentration | DCA           | 6291.2  | 171.4  |
| Center_6 | Human serum | High concentration | LCA           | 911.3   | 120.0  |
| Center_6 | Human serum | High concentration | $\alpha$ -MCA | 1306.7  | 88.0   |
| Center_6 | Human serum | High concentration | $\beta$ -MCA  | 4176.7  | 306.6  |
| Center_6 | Human serum | High concentration | $\omega$ -MCA | 1121.7  | 53.1   |
| Center_6 | Mouse serum | Low concentration  | CA            | 2693.3  | 304.4  |
| Center_6 | Mouse serum | Low concentration  | CDCA          | 1132.2  | 93.7   |
| Center_6 | Mouse serum | Low concentration  | GCA           | 448.3   | 28.3   |
| Center_6 | Mouse serum | Low concentration  | TCA           | 184.0   | 57.6   |
| Center_6 | Mouse serum | Low concentration  | DCA           | 597.3   | 33.6   |
| Center_6 | Mouse serum | Low concentration  | LCA           | 47.7    | 0.0    |

|          |             |                    |               |         |        |
|----------|-------------|--------------------|---------------|---------|--------|
| Center_6 | Mouse serum | Low concentration  | $\alpha$ -MCA | 132.8   | 24.1   |
| Center_6 | Mouse serum | Low concentration  | $\beta$ -MCA  | 398.3   | 113.7  |
| Center_6 | Mouse serum | Low concentration  | $\omega$ -MCA | 81.3    | 23.0   |
| Center_6 | Mouse serum | High concentration | CA            | 25246.7 | 1028.9 |
| Center_6 | Mouse serum | High concentration | CDCA          | 13833.8 | 2358.0 |
| Center_6 | Mouse serum | High concentration | GCA           | 35616.7 | 3028.8 |
| Center_6 | Mouse serum | High concentration | TCA           | 20004.0 | 1856.9 |
| Center_6 | Mouse serum | High concentration | DCA           | 5836.0  | 2330.3 |
| Center_6 | Mouse serum | High concentration | LCA           | 868.8   | 159.0  |
| Center_6 | Mouse serum | High concentration | $\alpha$ -MCA | 1207.5  | 41.8   |
| Center_6 | Mouse serum | High concentration | $\beta$ -MCA  | 3471.7  | 197.6  |
| Center_6 | Mouse serum | High concentration | $\omega$ -MCA | 921.0   | 78.3   |
